# Supplementary material for: Improved Nutritive Quality and Salt Resistance in Transgenic Maize by Simultaneously Overexpression of a Natural Lysine-Rich Protein Gene, SBgLR, and an ERF Transcription Factor Gene, TSRF1
Source: PubMed Central journal article supplement (PMC3676793; doi:10.3390/ijms14059459), 2013-04-29
Supplement: ijms-14-09459-s001.pdf [file ijms-14-09459-s001.pdf]

## Supplemental Information

**Figure S1.** Diagram of the two constructs used in the present study (not drawn to scale). (A) pTSSB; (B) pHpt. 35S Pro, *cauliflower mosaic virus* 35S promoter; 19Z Pro, maize 19 kD zein gene promoter; Adh1-int, the first intron of maize alcohol dehydrogenase gene 1; NOS-ter, nopaline synthase terminator; Hpt, hygromycin B phosphotransferase gene.

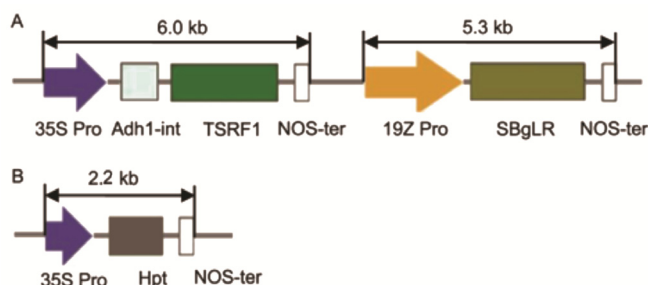

**Figure S2.** Transgenic plants derived from maize embryogenic calli by particle bombardment-mediated co-transformation. (A) Embryonic calli of maize inbred X178; (B) Hygromycin-resistant calli after 6 weeks of selection; (C) Shoot formation from the hygromycin-resistant calli. The photo was taken 3 weeks after hygromycin-resistant calli had been placed on hygromycin-containing regeneration medium; (D) Root development from hygromycin-resistant shoot after 2 weeks culture in the rooting medium; (E) Fertile plants in the greenhouse; (F) Seed set on the ears of R<sub>0</sub> plants; (G) PCR analysis of some R<sub>0</sub> plants for *SBgLR* gene. Lane 1: DNA Ladder, Lane 2: Positive control, Lane 3-8: Transformed plants, Lane 9: Untransformed plants as negative control; (H) PCR analysis of some R<sub>0</sub> plants for *TSRF1* gene. Lane 1: DNA Ladder, Lane 2: Positive control, Lane 3-9: Transformed plants, Lane 10: Untransformed plants as negative control. Scale bars: A–D and F, 1 cm; E, 30 cm.

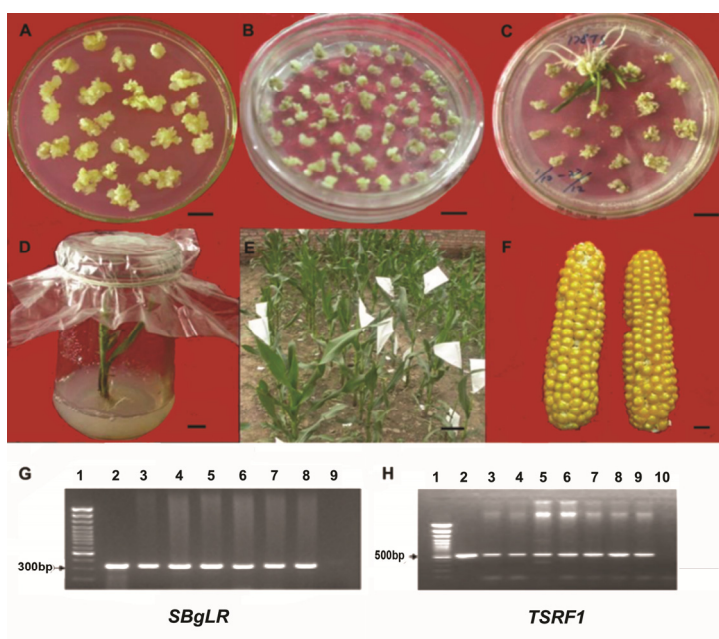

**Figure S3.** Average expression stability values of reference gene candidates by geNorm analysis.

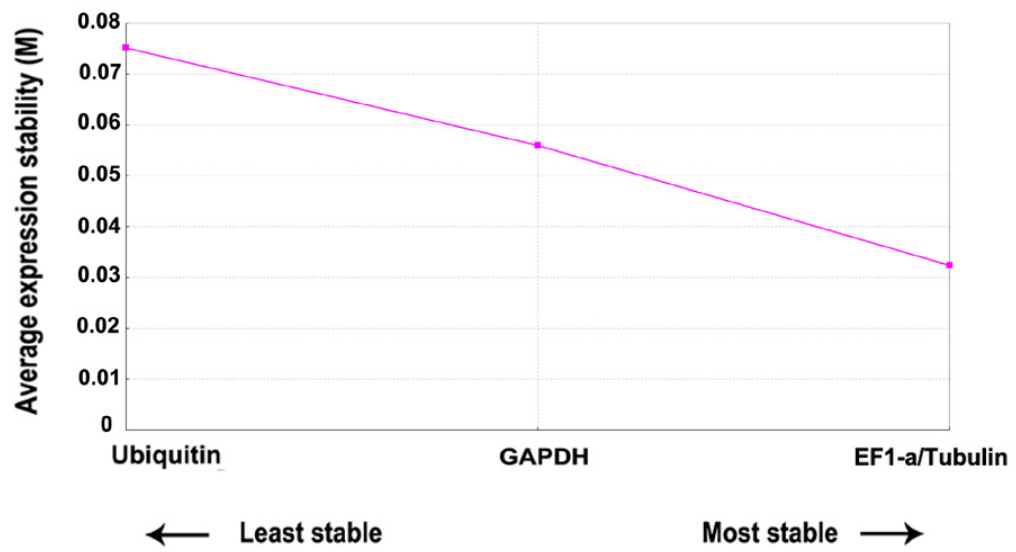

**Table S1.** Primers used in this study. The primers were designed using the Primer 3.0 software (version 0.4.0) (<http://frodo.wi.mit.edu/>). The accession numbers of these genes and the amplification lengths were described. Primer sequences of each gene for different uses were listed. F means forward primer. R means reverse primer.

| Gene             | Accession No.  | Use          | Primer sequences<br>(forward and reverse)                               | Amplicon<br>length (bp) |
|------------------|----------------|--------------|-------------------------------------------------------------------------|-------------------------|
| <i>SBgLR</i>     | AY377987.1     | PCR/Dot blot | F: 5'-TTGGAAATTCTCAACCTTGAA-3'<br>R: 5'-ATGAAGAATTGGAGGAACCTTGC-3'      | 260                     |
|                  |                | RT-PCR       | F: 5'-GAACGATGAAACAACCTCCGGTT-3'<br>R: 5'-GGCCTCAGAAACAGCGATAACTT-3'    | 181                     |
| <i>TSRF1</i>     | AF494201.1     | PCR/RT-PCR   | F: 5'-ACAACATCCGAAACAGTCAC-3'<br>R: 5'-CAGCACCCAAATCTTCAAAC-3'          | 472                     |
| <i>Tubulin</i>   | NM_001174192.1 | RT-PCR/qPCR  | F: 5'-GAGCATGGCATTTCAGGCTGTCG-3'<br>R: 5'-TCAACAAAAACAGCACGGGGGA-3'     | 128                     |
| <i>GAPDH</i>     | NM_001112119.1 | qPCR         | F: 5'-CCTTCCAGGGACTGAAAGACAG -3'<br>R: 5'-CTCCAAATCTCACGTGGCTA -3'      | 200                     |
| <i>Ubiquitin</i> | NM_001153555.1 | qPCR         | F: 5'-AGCTCCGACACCATCGACAA-3'<br>R: 5'-TTACTGACCACCGCGGAG -3'           | 180                     |
| <i>EF1-α</i>     | NM_001112117.1 | qPCR         | F: 5'-GGTGATGCTGGTATGGTGAA-3'<br>R: 5'-TCATTTCTTCTTGGCAGCAG-3'          | 192                     |
| <i>ZmMYC1</i>    | EU953366.1     | qPCR         | F: 5'-AATGAGCTGCGAGACGAGAAGCAA-3'<br>R: 5'-AGGGTAGCCAATCACAGGCATCAT-3'  | 192                     |
| <i>ZmMBY59</i>   | CM000780.2     | qPCR         | F: 5'-TGCCATCACCTTCATCCTCATCCT-3'<br>R: 5'-TGTGGTGCCTCAATCTCCTTCCAT-3'  | 190                     |
| <i>ZmSDR</i>     | GK000032.2     | qPCR         | F: 5'-TTGGAGCAGGCAATGGAGGGCAT-3'<br>R: 5'-CTTTGGACGTTCCAGTGGATGGAT-3'   | 178                     |
| <i>ZmrbcS</i>    | Y09214.1       | qPCR         | F: 5'-GCAACAAGAAGTTCGAGACGCTGT-3'<br>R: 5'-TACACGAACCCGAGCTTGCTGAA-3'   | 130                     |
| <i>ZmELIP</i>    | BT034060.1     | qPCR         | F: 5'-CCAACGCCGAGCTCTGGAA-3'<br>R: 5'-TACGCGTTGATGAACGGTGCG-3'          | 97                      |
| <i>ZmPSI-N</i>   | BT034060.1     | qPCR         | F: 5'-CCAACAAGGAGCTGAACGACAAGA-3'<br>R: 5'-AATCTCGAGGTCGTCGCTGATGAA-3'  | 167                     |
| <i>ZmOEE</i>     | CM000781.2     | qPCR         | F: 5'-GTACCAGATGAAGAAGCTGTGCCT-3'<br>R: 5'-ATGCCGTCCTTCTCCTCGAACTT-3'   | 192                     |
| <i>ZmPLAS</i>    | NM_001154032.1 | qPCR         | F: 5'-AAGATCTCGCAGGAGGAGTACCTCA-3'<br>R: 5'-TTAGTTGACGGTGATCTTGCCGAC-3' | 135                     |
| <i>ZmP5CS1</i>   | BT083588.1     | qPCR         | F: 5'-ATCCTTGTGACCTCAGGTGCTGTT-3'<br>R: 5'-AGTTGCGAGGAGGACACATCAAGT-3'  | 197                     |
| <i>ZmP5CS2</i>   | CM000784.2     | qPCR         | F: 5'-GCAAGTTGATAGTGCCGCTGTGTT-3'<br>R: 5'-ACTCCCTTGTCACCATTCACT-3'     | 195                     |

**Table S2.** Lysine content of T<sub>2</sub> seeds. Samples were ground corn meal of 20 mature kernels from T<sub>2</sub> individual self-fertilized ears. The lysine contents are expressed as g/100 g dry seed. Data are averages of triplicate  $\pm$  standard deviations. Asterisks \*\* denote transgenic lines statistically different from control by Student *t*-test at  $p < 0.01$ .

| Line number | Lysine content (g/100 g dry weight) | Increase (%) |
|-------------|-------------------------------------|--------------|
| 9-10        | 0.308 $\pm$ 0.06                    | 48.79 **     |
| 9-11        | 0.284 $\pm$ 0.01                    | 37.20 **     |
| 10-9        | 0.337 $\pm$ 0.01                    | 62.80 **     |
| 12-8        | 0.318 $\pm$ 0.02                    | 53.62 **     |
| 17-8        | 0.287 $\pm$ 0.01                    | 38.65 **     |
| 19-11       | 0.306 $\pm$ 0.05                    | 47.83 **     |
| 20-9        | 0.314 $\pm$ 0.02                    | 51.69 **     |
| 21-9        | 0.243 $\pm$ 0.01                    | 17.39 **     |
| control     | 0.207 $\pm$ 0.02                    | -            |

© 2013 by the authors; licensee MDPI, Basel, Switzerland. This article is an open access article distributed under the terms and conditions of the Creative Commons Attribution license (<http://creativecommons.org/licenses/by/3.0/>).
